# Supplementary material for: Endothelial Activation and Stress Index (EASIX) as an Early Predictor for Mortality and Overall Survival in Hematological and Non-Hematological Patients with COVID-19: Multicenter Cohort Study
Source: MDPI journal article supplement (doi:10.3390/jcm10194373), 2021-09-24
Supplement: s1 [file s1]

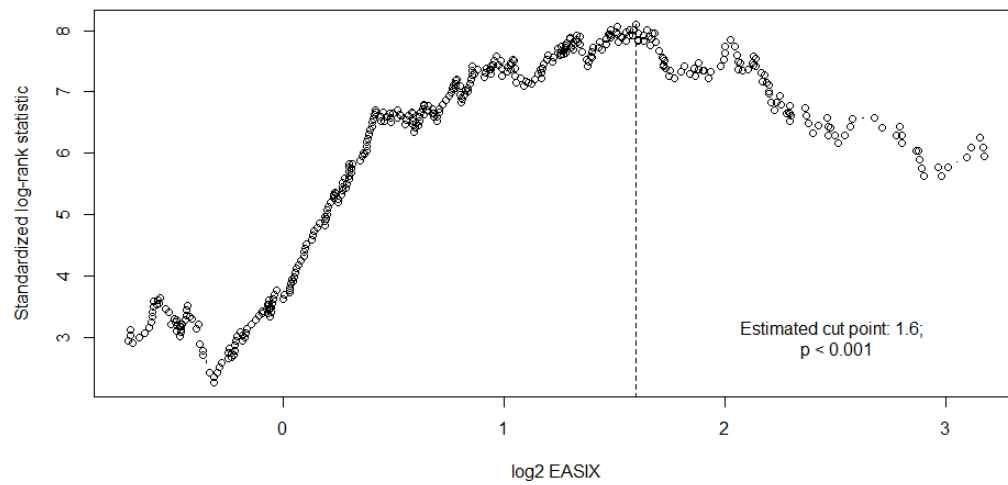

**Figure S1.** Cut-point selection for log2 EASIX in the COVID-19 patients, maximal selected log rank statistics.

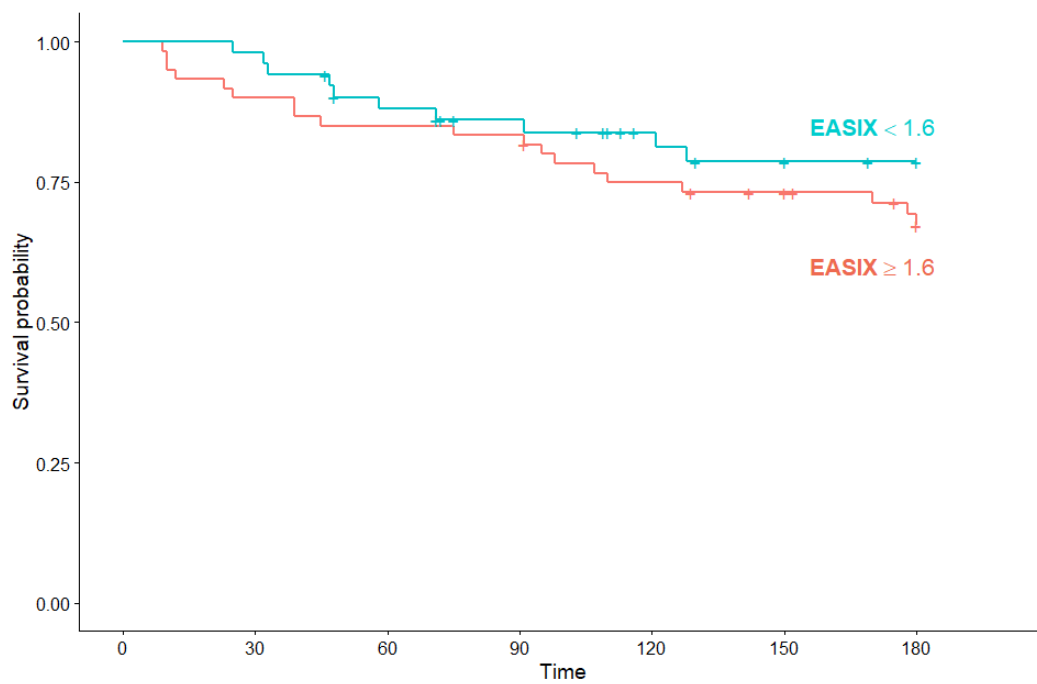

**Figure S2.** Kaplan-Meier survival curves for overall survival in validation cohort of 111 hematological patients without COVID-19 according to EASIX score.
